# Supplementary material for: Rethinking the use of finite element simulations in comparative biomechanics research
Source: PeerJ journal article supplement (doi:10.7717/peerj.11178), 2021-04-07
Supplement: Tseng_PeerJ-FEA_Tables_S1_to_S3.zip [file Tseng_PeerJ-FEA_Tables_S1_to_S3.zip]

## Sheet: Sheet1
Ref	origE (GPa)	Genus	Species	Specimen	Volume (mm3)	Force (N)	UACME	UAP4ME	UADJCSE	UADJP4SE	ACME	AP4ME	ADJCSE	ADJP4SE
PerezRamosetal2020_SciAdv	18	Ailuropoda	melanoleuca	VU 3156b	944352	9208.33	0.168769	0.245332	0.524346	0.468453	0.168769	0.245332	0.524346	0.468453
This study	18	Aonyx	capensis	CMNH17632	62469.2	1984.29	0.248299	0.356629	0.929749	1.18419	0.248299	0.356629	0.929749	1.18419
PerezRamosetal2020_SciAdv	18	Helarctos	malayanus	AMNH28254	242534	4864.6	0.16777	0.225269	0.573076	0.495901	0.16777	0.225269	0.573076	0.495901
This study	18	Hydrictis	maculicollis	AMNH84807	14312	952.593	0.304215	0.512271	1.17614	2.44375	0.304215	0.512271	1.17614	2.44375
This study	18	Lutra	lutra	AMNH206592	24630	1100.87	0.199952	0.312222	1.14883	1.17516	0.199952	0.312222	1.14883	1.17516
PerezRamosetal2020_SciAdv	18	Melursus	ursinus	AMNH54464	426105	7253.16	0.170584	0.241178	0.662585	0.63745	0.170584	0.241178	0.662585	0.63745
PerezRamosetal2020_SciAdv	18	Tremarctos	ornatus	VU 1661	279705	5126.16	0.142294	0.191402	0.445101	0.427072	0.142294	0.191402	0.445101	0.427072
PerezRamosetal2020_SciAdv	18	Ursus	americanus	USNM227070	909260	8598.71	0.142165	0.201459	0.532091	0.629693	0.142165	0.201459	0.532091	0.629693
PerezRamosetal2020_SciAdv	18	Ursus	arctos	USNM 82003	1319888	13695	0.164664	0.182354	0.512311	0.494006	0.164664	0.182354	0.512311	0.494006
PerezRamosetal2020_SciAdv	18	Ursus	maritimus	H.001-05	1469770	12972.3	0.124769	0.186778	0.492157	0.551282	0.124769	0.186778	0.492157	0.551282
PerezRamosetal2020_SciAdv	18	Ursus	thibetanus	VU 2421	785900	8313	0.142923	0.20382	0.522676	0.475945	0.142923	0.20382	0.522676	0.475945
Prybylaetal2019_JVP	20	Ailurus	fulgens	Valladolid	39503.2	674.89	0.165071	0.258279	0.529024	0.499634	0.166352	0.258758	0.576248	0.544201
Prybylaetal2019_JVP	20	Bassariscus	astutus	AMNH135964	10970.7	530.4	0.144363	0.237368	0.379681	0.406356	0.145821	0.238027	0.413404	0.44249
Prybylaetal2019_JVP	20	Canis	lupus	LACM23010	207926	2510	0.101394	0.182271	0.768635	0.71595	0.103222	0.183403	0.83752	0.780071
Prybylaetal2019_JVP	20	Canis	mesomelas	UCLA3000	89280.1	1015	0.149261	0.244828	1.0298	0.85407	0.150677	0.245422	1.12229	0.930678
Prybylaetal2019_JVP	20	Crocuta	crocuta	USNM164506	629930	7461.02	0.174736	0.289176	0.391286	0.436199	0.175933	0.289389	0.426059	0.475031
Prybylaetal2019_JVP	20	Gulo	gulo	AMNH182936	93604.1	2086.56	0.258032	0.355585	0.336528	0.27599	0.258513	0.355227	0.366351	0.300339
Prybylaetal2019_JVP	20	Herpestes	javanicus	AMNH101655	10224.4	262.21	0.116891	0.187445	0.569197	0.520725	0.118586	0.188533	0.620052	0.567198
Prybylaetal2019_JVP	20	Lycaon	pictus	SAM-ZM12245	223484	1854.34	0.204654	0.317902	1.17936	1.15714	0.205594	0.317868	1.28538	1.26114
Prybylaetal2019_JVP	20	Mephitis	mephitis	AMNH172133	8856.21	217.42	0.101417	0.138212	0.778011	0.774169	0.103244	0.139723	0.847743	0.843554
Prybylaetal2019_JVP	20	Panthera	pardus	AMNH113745	409127	2168.94	0.0829898	0.141544	0.499205	0.436975	0.0849761	0.143027	0.543733	0.475878
Prybylaetal2019_JVP	20	Parahyaena	brunnea	FMNH34584	358807	4135.62	0.171213	0.33073	0.477962	0.583139	0.17244	0.330585	0.520569	0.635255
Prybylaetal2019_JVP	20	Potos	flavus	AMNH239990	20233.1	1069.64	0.263308	0.372097	1.7036	1.1242	0.263744	0.371597	1.85701	1.22523
Prybylaetal2019_JVP	20	Procyon	lotor	AMNH24815	37352.3	650.91	0.114532	0.162081	0.78577	0.703747	0.116247	0.163387	0.856204	0.766766
Prybylaetal2019_JVP	20	Spilogale	putorius	AMNH35207	3509.39	339.77	0.104129	0.14771	0.238371	0.232923	0.105934	0.14914	0.25932	0.253379
Prybylaetal2019_JVP	20	Taxidea	taxus	AMNH120577	57448.5	1560.48	0.340664	0.541436	0.516164	0.398182	0.340435	0.53948	0.562225	0.433577
Prybylaetal2019_JVP	20	Urocyon	cinereoargenteus	AMNH147213	19398.9	786.468	0.137981	0.223517	0.976341	0.854974	0.139495	0.224295	1.064	0.931664
